# Supplementary material
Source: PubMed Central journal article supplement (PMC3512064)

## Supplemental Figure Legends

**Fig S1. Cycloheximide does not block the stimulatory effect of TNF- $\alpha$  on sLEPR release.** Ad-LEPRb-infected HEK293 cells were pre-treated with or without 50  $\mu$ g/ml cycloheximide (CHX and control, respectively) for 30 min followed by 20 hr treatment with vehicle or 20 ng/ml TNF- $\alpha$  in the continuous presence or absence of CHX. sLEPR levels in conditioned media were determined by ELISA (A), and LEPRb in cell lysates were determined by Western blotting (B).

**Fig S2. Chloroquine does not block the stimulatory effect of TNF- $\alpha$  on LEPRb protein levels.** LEPRb-transfected N2a cells were pre-treated with chloroquine (50  $\mu$ M) for 30 min followed by 6 hr treatment with vehicle or TNF- $\alpha$  (50 ng/ml). LEPRb and  $\alpha$ -tubulin levels in cell lysates were determined by Western blotting.

**Fig S3. TNF- $\alpha$  activates multiple MAP kinase pathways.** Ad-LEPRb-infected HEK293 cells were treated with TNF- $\alpha$  at the indicated concentrations for 6 hours. Levels of JNK/SAPK, p38 MAP kinase and p44/p42 (ERK1/2) and their phosphorylated counterparts were determined by Western blotting using antibodies specified to the phospho-protein or the total protein.

**Fig S4. PMA stimulates LEPRb protein expression.** Ad-LEPRb-infected HEK293 cells were treated with PMA (1  $\mu$ g/ml) for 15 hrs. Levels of LEPRb in cell lysates and sLEPR in conditioned media were determined by Western blotting. A duplicate set of samples are shown.

**Supplemental Figures**

**Fig S1**

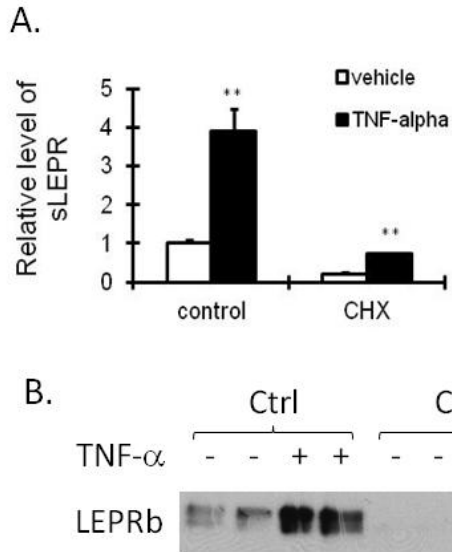

**Fig S2**

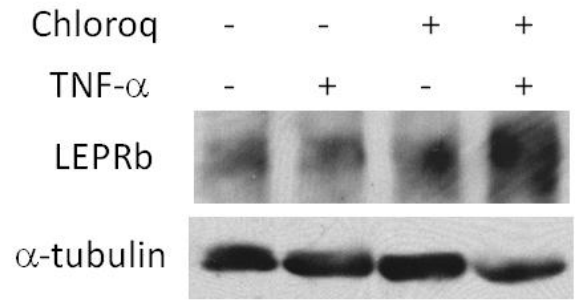

**Fig S3**

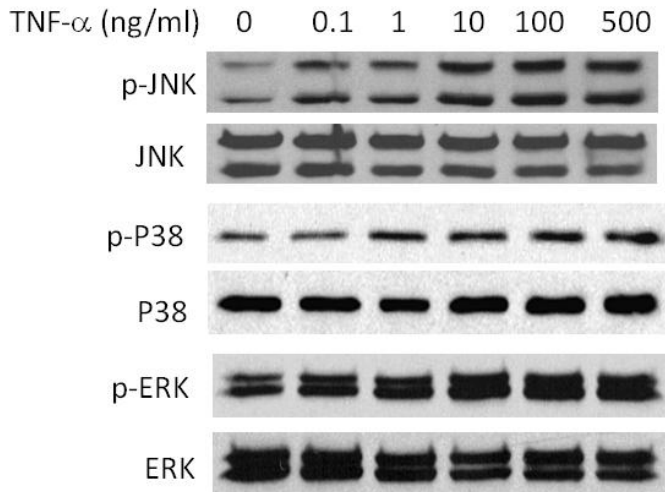

**Fig S4**

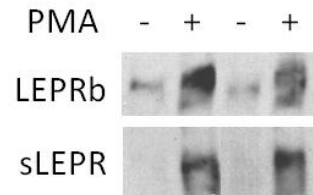

Supplement: supp_en.2012-1510v1_En-12-1510SuppFigs4.pdf [file supp_en.2012-1510v1_En-12-1510SuppFigs4.pdf]
